# Supplementary material for: Laccase-immobilized tannic acid-mediated surface modification of halloysite nanotubes for efficient bisphenol-A degradation
Source: Royal Society of Chemistry journal article supplement (doi:10.1039/c9ra06171a), 2019-01-01
Supplement: c9ra06171a1.pdf [file c9ra06171a1.pdf]

1 **Electronic Supplementary Information:**

2 **Laccase immobilized on tannic acid-mediated surface**  
3 **modification of halloysite nanotubes and its efficient bisphenol A**  
4 **degradation**

5 Liting Zhang<sup>a,c</sup>, Wen Tang<sup>b</sup>, Tonghao Ma<sup>c</sup>, Lina Zhou<sup>c</sup>, Chenggong Hui<sup>b</sup>, Xiaoli  
6 Wang<sup>c</sup>, Ping Wang<sup>d</sup>, Changai Zhang<sup>a,\*</sup>, Chao Chen<sup>c,\*</sup>  
7

8 <sup>a</sup>Zhejiang Province Key Laboratory of Recycling and Eco-treatment of Waste Biomass, Zhejiang  
9 University of Science and Technology, Hangzhou, 310023, China

10 <sup>b</sup>State Key Laboratory of Bioreactor Engineering, New World Institute of Biotechnology, East  
11 China University of Science and Technology, No.130 Meilong Road, Shanghai 200237, People's  
12 Republic of China.

13 <sup>c</sup>State Key Laboratory of Bioreactor Engineering, Biomedical Nanotechnology Center, School of  
14 Biotechnology, East China University of Science and Technology, Shanghai 200237, People's  
15 Republic of China.

16 <sup>d</sup>Department of Bioproducts and Biosystems Engineering, University of Minnesota, St Paul, MN  
17 55108, USA.

18 *E-mail addresses:* [chaochen@ecust.edu.cn](mailto:chaochen@ecust.edu.cn) (C.Chen), [zca2006@sina.com](mailto:zca2006@sina.com) (C. Zhang).

19

## 20 **Experiments**

### 21 **Biocompatibility assay**

22 MTT viability assay was performed to examine the biocompatibility of HNTs-TA  
23 according to the previous studies with some modification [42]. In brief, normal L-02  
24 cells were seeded in 96-well plate with approximately  $5 \times 10^3$  cells per well and  
25 cultured in 5 % CO<sub>2</sub> at 37°C overnight. Subsequently, free culture medium containing  
26 different concentrate of HNTs or HNTs-TA (0-200 µg/mL) was added to replace the  
27 original culture medium for another 24 h, respectively. After the incubation time, the  
28 *in vitro* toxicity of L-02 cells induced by HNTs-TA was measured by MTT assay.

29

30

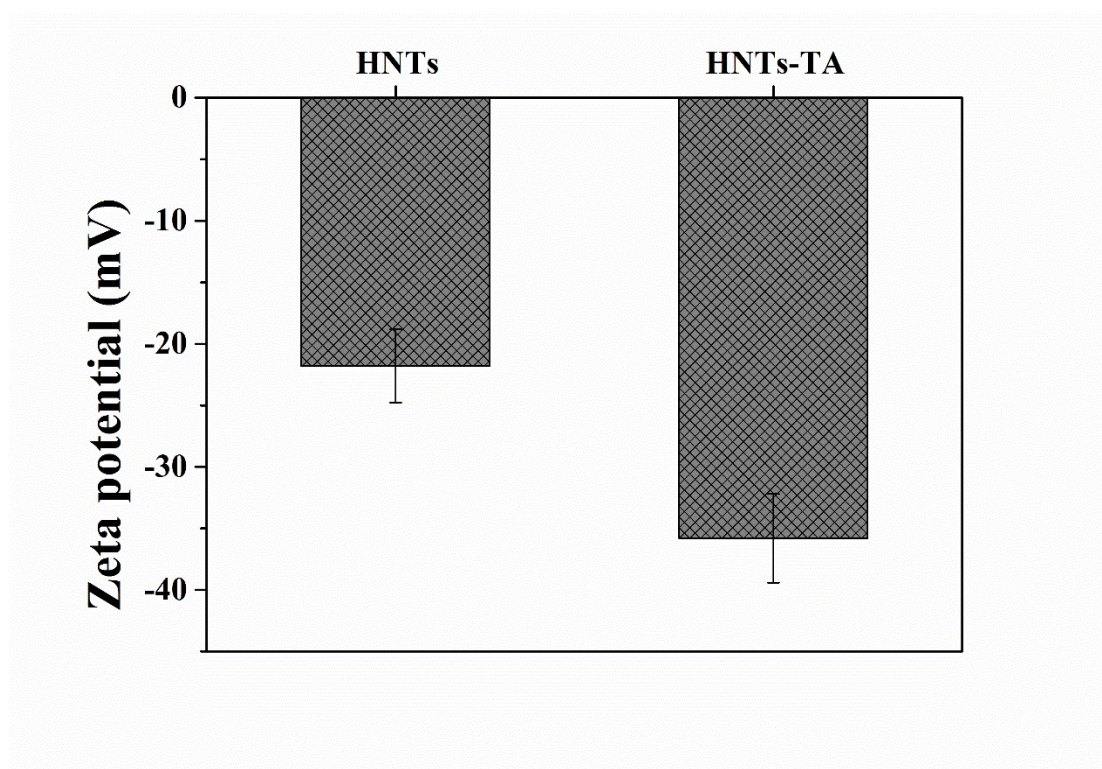

31

32 **Fig. S1.** Zeta potential of HNTs and HNTs-TA.

33 As shown in Fig. S1, the zeta potential value of HNTs was -21.8 mV. After HNTs  
34 modified by tannic acid (TA), the zeta potential values of HNTs-TA were decreased  
35 to -35.8 mV due to the presence of plentiful OH groups present in TA, indicating  
36 HNTs were successfully functionalized by tannic acid.

37

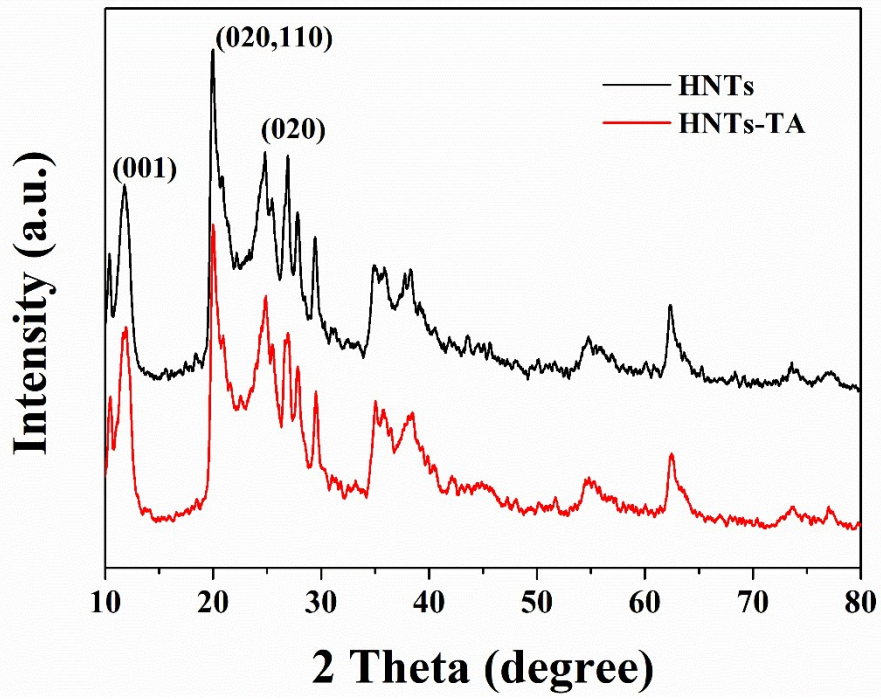

38

39

40 **Fig. S2.** XRD patterns of HNTs and HNTs-TA.

41

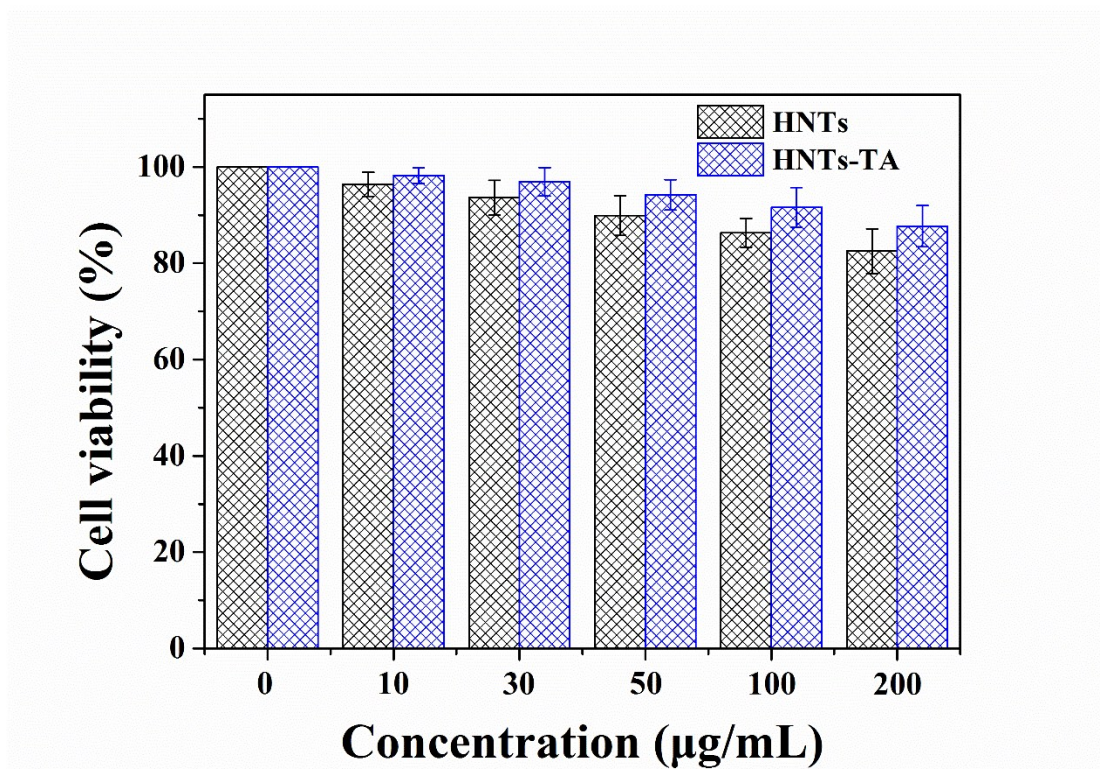

42

43

44 **Fig. S3.** Cell viability of L-02 cells after incubation with HNTs or HNTs-TA at

45 different concentration (0-200 µg/mL).

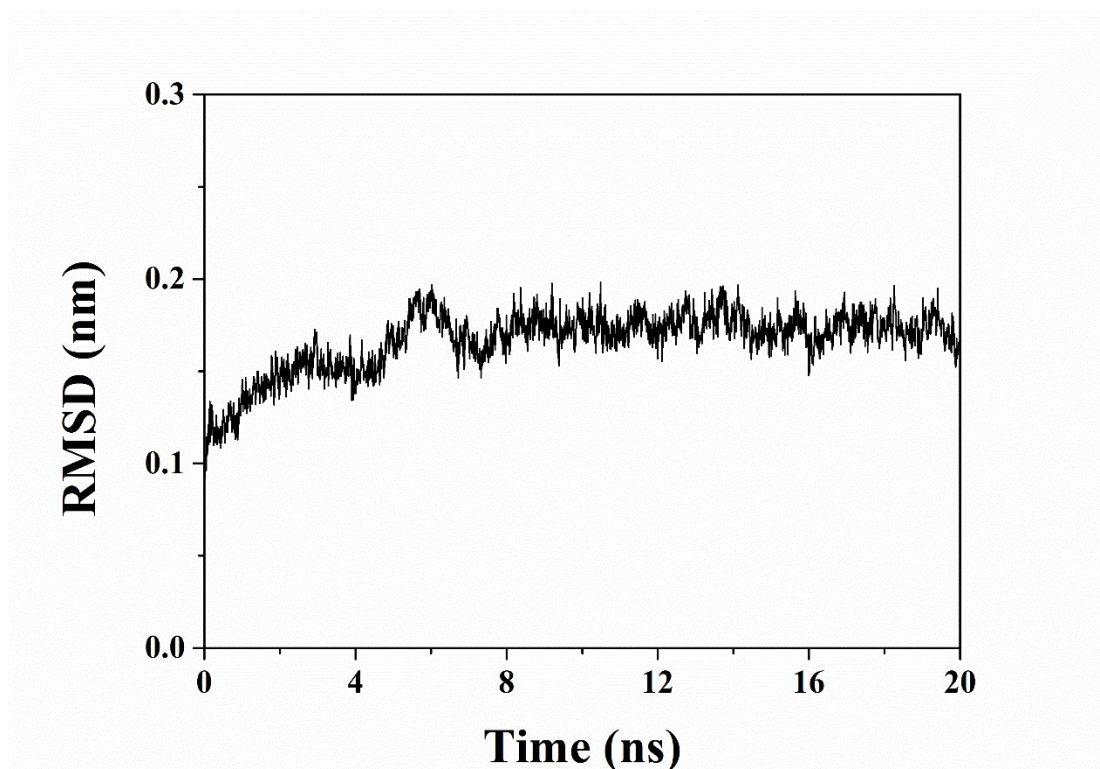

46

47

48 **Fig. S4.** The evolution of root-mean-square deviation (RMSD) of free laccase versus

49 simulation time.

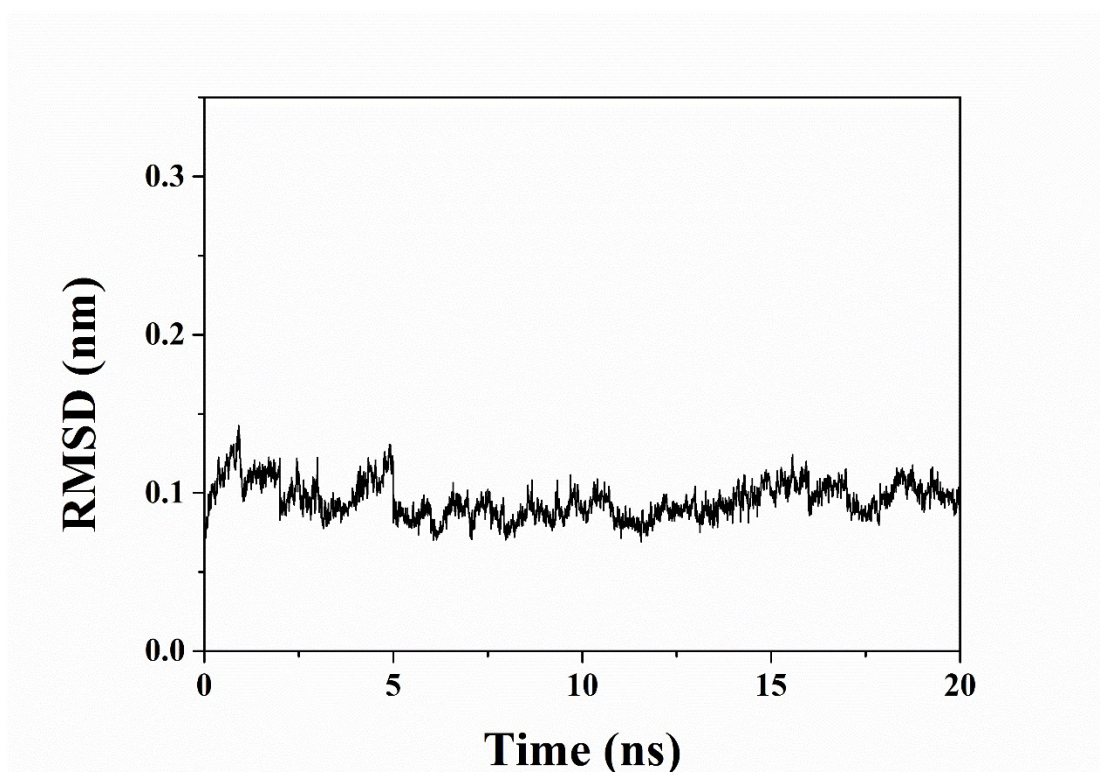

50

51 **Fig. S5.** The evolution of root-mean-square deviation (RMSD) of immobilized  
52 laccase versus simulation time.

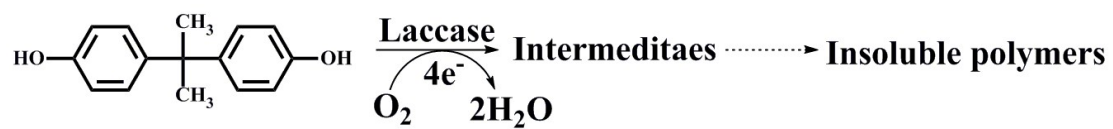

53

54 **Fig. S6.** Proposed pathway of BPA removal by laccase-mediated biocatalytic reaction.

55



56 **Reference**

57 [1] J.P. Xia, Y.N. Du, L.P. Huang, B. Chaurasiya, J.S. Tu, T.J. Webster, C.M. Sun, Redox-  
58 responsive micelles from disulfide bond-bridged hyaluronic acid-tocopherol succinate for the  
59 treatment of melanoma, *Nanomed-Nanotechnol*, 14 (2018) 713-723.

60

61
